# Supplementary material
Source: PubMed Central journal article supplement (PMC7594114)
Supplement: NIHMS1639824-supplement-supp.pdf [file NIHMS1639824-supplement-supp.pdf]

**Supporting Information for “Zero-inflated  
Poisson Factor Model with Application to  
Microbiome Read Counts”**

**by**

Tianchen Xu\*

Mailman School of Public Health, Columbia University, NY 10032, USA

Ryan T. Demmer

School of Public Health, University of Minnesota, MN 55454, USA

Gen Li

Mailman School of Public Health, Columbia University, NY 10032, USA

# 1 Web Appendix A

In order to obtain the initial  $U$  and  $V$ , we apply the singular value decomposition (SVD) to the log-transformed matrix  $\tilde{A}$  and obtain the components  $\{U', V', S'\}$  (i.e.,  $\ln(\tilde{A}) = U' S' V'^T$ ). Set  $V^{old} = V'$  and  $U^{old} = (s'_{11} u'_{(1)}, s'_{22} u'_{(2)}, \dots, s'_{KK} u'_{(K)})$ , where  $s'_{kk}$  is the  $k$ -th diagonal element of  $S'$ . Assuming matrix  $U^{old}$  is known, we estimate the loadings  $v_{(j)}$  and shape parameter  $\tau$  by fitting a ZIP regression (will be discussed in Section 2.3) with  $a_{(j)}$  as the response, vector  $u_{(1)}^{old}, u_{(2)}^{old}, \dots, u_{(K)}^{old}$  as the covariates and a scaling vector  $N$  as an extra offset parameter. Since  $A$  has  $m$  columns, we need to fit  $m$  GLMs to obtain  $m$  rows in  $V$ . However, an important assumption of our model is that the link between  $p_{ij}$  and  $\lambda_{ij}$  (i.e.,  $\tau$ ) remains the same across all  $m$  different GLMs. To accommodate this, we solve all  $m$  models simultaneously to get a globally best  $\tau$  value. Here we combine the response, covariates and offset parameter in  $m$  regressions into larger scale matrices  $A^{(u)}$ ,  $U^{*old}$  and  $N^{(u)}$  and fit a ZIP regression with  $A^{(u)}$  as response variable, columns in  $U^{*old}$  as covariates and  $N^{(u)}$  as the offset parameter:

$$A^{(u)} = \begin{pmatrix} a_{(1)} \\ a_{(2)} \\ \vdots \\ a_{(m)} \end{pmatrix}, \quad U^{*old} = \underbrace{\begin{pmatrix} U^{old} & & & \\ & U^{old} & & \\ & & \ddots & \\ & & & U^{old} \end{pmatrix}}_{m \text{ times}}, \quad N^{(u)} = \left. \begin{pmatrix} N \\ N \\ \vdots \\ N \end{pmatrix} \right\} m \text{ times}.$$

The fitted coefficient  $V^s$  is a combined vector of  $v_{(i)}$  such that  $V^s = (v_{(1)}, v_{(2)}, \dots, v_{(m)})$ . We could obtain the fitted  $V^{new}$  by cutting  $V^s$  to  $v_{(i)}$ 's and rearrange  $v_{(i)}$ 's to matrix  $V^{new}$ .

Then update  $U^{new}$  in a similar fashion. The response and covariates are  $A^{(v)}$  and every

columns in  $V^{\star new}$  and an offset parameter  $N^{(v)}$  is needed as well:

$$A^{(v)} = \begin{pmatrix} a_{(1,)}^\top \\ a_{(2,)}^\top \\ \vdots \\ a_{(n,)}^\top \end{pmatrix}, \quad V^{\star new} = \underbrace{\begin{pmatrix} V^{new} & & & \\ & V^{new} & & \\ & & \ddots & \\ & & & V^{new} \end{pmatrix}}_{n \text{ times}}, \quad N^{(v)} = \left( \underbrace{N_1, \dots, N_1}_{m \text{ times}}, \dots, \underbrace{N_n, \dots, N_n}_{m \text{ times}} \right)^\top.$$

The fitted coefficient is  $U^s = (u_{(1,)}, u_{(2,)}, \dots, u_{(n,)})$  and thus the  $U^{new}$  is able to be reconstructed from  $U^s$  in a similar way like  $V^{new}$ .

After  $U$ ,  $V$  are updated, one more step is involved to ensure the uniqueness and orthogonality of these updated components. We apply SVD to the  $U^{new}V^{newT}$  and label the components by  $\{U', V', S'\}$ . Set  $U^{old} = (s'_{11}u'_{(1)}, s'_{22}u'_{(2)}, \dots, s'_{KK}u'_{(K)})$  and  $V^{old} = V'$ .

We use the updated  $U$ ,  $V$  and  $\tau$  to obtain the estimates of  $\Lambda$  and  $P$  in the current round of iteration and then calculate the likelihood value  $L(A)$ :

$$L(A) = \prod_{i,j} L(a_{ij}; U, V, \tau, N) = \prod_{i,j} \left\{ p_{ij} \mathbb{I}(a_{ij} = 0) + (1 - p_{ij}) \frac{(N_i \lambda_{ij})^{a_{ij}} e^{-N_i \lambda_{ij}}}{a_{ij}!} \right\}$$

where  $\ln(\lambda_{ij}) = \sum_{k=1}^K u_{ik} v_{jk}$  and  $\text{logit}(p_{ij}) = -\tau \ln(\lambda_{ij})$ .

When the percentage of total likelihood difference between two iterations is less than a certain small value, the algorithm terminates; Otherwise, we continue to update  $U$ ,  $V$ ,  $\tau$  until convergence. In ZIP regression step where  $U$ ,  $V$  and  $\tau$  are updated, we will use the EM algorithm to estimate the coefficients (see Section 2.3), and thus the likelihood increases due to the nature of EM algorithm used in regression estimation. The likelihood remains the same in SVD step. Overall, the algorithm is guaranteed to converge.

## 2 Web Appendix B

LM algorithm introduces a positive damping parameter  $\mu$ . If we reduce  $\mu$ , the LM algorithm behaves like Newton's method, which is a good way to get quadratic convergence in the final

stages of the iteration; while if we enlarge  $\mu$ , the descent direction in LM algorithm is closer to the gradient descent method, which is free from the information of second derivative of the objective function and thus the algorithm still works when the Hessian matrix of the objective function is ill-conditioned or nearly singular. Such an algorithm could be put into the trust-region framework and is implemented in many solvers with common programming languages [Yuan, 1999, Moré and Sorensen, 1983].

## B.1 LM Algorithm

We use Levenberg-Marquardt method to solve  $\beta$  and  $\tau$ . The objective function is  $Q(\beta, \tau) = -\ln(L)$  and we want to minimize the objective function. The log likelihood function is:

$$\begin{aligned}\ln(L) &= \sum_{i=1}^n z_i \ln(p_i) + \sum_{i=1}^n (1 - z_i) \{y_i \ln(m_i \lambda_i) - m_i \lambda_i - \ln(y_i!) + \ln(1 - p_i)\} \\ &= -\tau Z X \beta - \sum_{i=1}^n \ln(1 + e^{-\tau X_i^\top \beta}) \\ &\quad + (1 - Z) \{ \text{diag}(y_i)(X\beta + \ln(m)) - \text{diag}(m_i)e^{X\beta} - \ln(Y!) \}\end{aligned}$$

where  $\text{diag}(\alpha_i)$  represents a matrix whose diagonal elements are  $\alpha_i$ ;  $\ln$  is a pointwise operator on the vector.

The first and second derivative of  $\ln(L)$  are:

$$\begin{aligned}J_\beta &= \frac{\partial \ln(L)}{\partial \beta^\top} = (-\tau Z + \tau W + (1 - Z)U) X \\ J_\tau &= \frac{\partial \ln(L)}{\partial \tau} = (W - Z)X\beta \\ H_{\beta\beta} &= \frac{\partial^2 \ln(L)}{\partial \beta \partial \beta^\top} = X^\top R X \\ H_{\tau\tau} &= \frac{\partial^2 \ln(L)}{\partial \tau^2} = - \sum_{i=1}^n \frac{(X_i^\top \beta)^2 e^{\tau X_i^\top \beta}}{(e^{\tau X_i^\top \beta} + 1)^2} \\ H_{\tau\beta} &= \frac{\partial^2 \ln(L)}{\partial \tau \partial \beta^\top} = (V - Z)X\end{aligned}$$

where  $W = ((e^{\tau X_1 \beta} + 1)^{-1}, \dots, (e^{\tau X_n \beta} + 1)^{-1})$ ,

$$\begin{aligned}
U &= \text{diag} \left( y_i - m_i e^{X_i^\top \beta} \right), \\
R &= \text{diag} \left( -\frac{\tau^2 e^{\tau X_i^\top \beta}}{(e^{\tau X_i^\top \beta} + 1)^2} - (1 - z_i)(m_i e^{X_i^\top \beta}) \right), \\
V &= \left( \frac{e^{\tau X_1 \beta} - \tau X_1 \beta e^{\tau X_1 \beta} + 1}{(e^{\tau X_1 \beta} + 1)^2}, \dots, \frac{e^{\tau X_n \beta} - \tau X_n \beta e^{\tau X_n \beta} + 1}{(e^{\tau X_n \beta} + 1)^2} \right).
\end{aligned}$$

In addition,  $\text{diag}(\alpha_i)$  represents a matrix whose diagonal elements are  $\alpha_i$ ;  $\ln$  is a pointwise operator on the vector.

Correspondingly, the Jacobian ( $J$ ) and Hessian ( $H$ ) matrix of objective function  $Q(\beta, \tau)$  are:

$$J(\beta, \tau) = - \begin{pmatrix} J_\beta^\top \\ J_\tau \end{pmatrix} \quad H(\beta, \tau) = - \begin{pmatrix} H_{\beta\beta} & H_{\tau\beta}^\top \\ H_{\beta\tau} & H_{\tau\tau} \end{pmatrix}$$

*Initialize:*

*Step 1:* Set initial  $\beta_0$  and  $\tau_0$ , which is discussed in Section 2.3. Then we calculate  $J_0$  with these initial values.

*Step 2:* Set initial damping parameter  $\mu$ :

$$\mu = \rho \cdot J_m$$

where  $\rho$  is user specified and the default value is  $1 \times 10^{-5}$ ;  $J_m$  is the maximum element in matrix  $J_0^\top J_0$ .

*Iterating:*

*Step 3:* Multiply  $\mu$  by 2 until  $(H(\beta, \tau) + \mu I)$  is positive definite.

*Step 4:* Obtain the descent direction  $h$  by solving equation:

$$(H(\beta, \tau) + \mu I)h = -J(\beta, \tau).$$

*Step 5:* Define and compute the gain ratio  $\delta$ :

$$\delta = -\frac{Q(\beta, \tau) - Q((\beta, \tau) + h)}{h^\top J(\beta, \tau) + \frac{1}{2}h^\top (H(\beta, \tau) + \mu I)h}.$$

*Step 6:* If  $\delta > 0.001$ , we obtain better  $\ln L(\beta, \tau)$  value, so we update  $\beta, \tau, \mu$  by:

$$\begin{pmatrix} \beta_{k+1} \\ \tau_{k+1} \end{pmatrix} = \begin{pmatrix} \beta_k \\ \tau_k \end{pmatrix} + h, \quad \mu = \mu \cdot \max \left\{ \frac{1}{3}, 1 - (2\delta - 1)^3 \right\}$$

If  $\delta \leq 0.001$ , do not update  $\beta, \tau$ . Update  $\mu = 2\mu$ .

*Step 7:* Repeat from step 3 to step 6 until the algorithm converges. The convergence criterion is discussed in Section 2.3.

## B.2 Initial Values

Similar to many fitting algorithms, the LM algorithm only finds a local extremum, which requires us to provide a reasonable initial  $\tau_0$  and  $\beta_0$ . Fitted  $\beta$  from Poisson regression could be used as the initial value in the first iteration of the EM algorithm. For initial value of  $\tau_0$ , we have to estimate  $\bar{p}$  first. Assuming that all  $y_i$  from the Poisson distribution are not zero, estimate  $\bar{p}$  under such an assumption:

$$\bar{p} = \frac{\# y_i\text{'s that are zeros}}{n}$$

Obviously, this expression will overestimate the  $\bar{p}$ , because zeros from the Poisson distribution are wrongly regraded and counted as a part of true zeros, especially when the estimated  $\bar{p}$  is relatively low. However, such a estimator is usually accurate enough to help the fitting algorithm to converge. Then we are able to estimate the initial  $\tau_0$  at beginning of each round by the following expression (the derivation is at end of Web Appendix B):

$$\tau_0 = -\frac{n \logit(\bar{p})}{\sum_{i=1}^n X_i^\top \beta} \quad (1)$$

In practice, if the model is stable and the algorithm converges successfully with all initial parameters ( $\tau$  and  $\beta$ ) in the previous iteration, we tend to use the fitted the parameters in the previous iteration, for which will accelerate the convergency speed. Only if using the previous parameters as the initial parameter causes divergence, we will then turn to the estimation of  $\beta_0$  and  $\tau_0$  mentioned above.

*Derivation of equation (1):*

Since we have the relationship between  $p_i$  and  $\lambda_i$ :

$$\text{logit}(p_i) = -\tau \ln(\lambda_i)$$

Plug  $\ln(\lambda_i) = X_i^\top \beta$  into the expression above:

$$\text{logit}(p_i) = -\tau X_i^\top \beta$$

We use  $\text{logit}(\bar{p})$  to present the mean value on the left hand side, and take the average of  $X_i \beta$ :

$$\text{logit}(\bar{p}) = -\frac{\tau}{n} \sum_{i=1}^n X_i^\top \beta$$

Correspondingly, the estimation of  $\tau_0$  is:

$$\tau_0 = -\frac{n \text{logit}(\bar{p})}{\sum_{i=1}^n X_i^\top \beta}$$

### 3 Web Appendix C

We generate rank-3 synthetic NGS data of 200 samples ( $n = 200$ ) and 100 taxa ( $m = 100$ ) according to the assumption in our paper. The Poisson logarithmic rate matrix  $\Lambda = UV^\top$ , where  $U \in \mathbb{R}^{m \times 3}$  is a left singular vector matrix, and  $V \in \mathbb{R}^{n \times 3}$  is a right singular vector matrix. We consider three different clustering patterns in the samples as depicted in  $U$ . To generate  $U$ , we create a 200-by-3 matrix  $U$  such that:

$$U(36 : 80, 1) = 2.0, \quad U(81 : 140, 1) = 1.7$$

$$U(1 : 35, 2) = 1.8, \quad U(36 : 80, 2) = 0.9$$

$$U(36 : 200, 3) = 1.7$$

with all the other entries being 0, and then jitter all the entries by adding random numbers generated from  $N(0, 0.06^2)$ . Similarly, To generate  $V$ , we create a 100-by-3 matrix  $V$  such

that:

$$V(61 : 100, 1) = 1.7$$

$$V(36 : 60, 2) = 1.7, \quad V(61 : 100, 2) = 1.0$$

$$V(1 : 25, 3) = 1.7, \quad V(26 : 100, 3) = 0.9$$

with all the other entries being 0, and then jitter all the entries by adding random numbers generated from  $N(0, 0.05^2)$ . The three columns of  $U$  and  $V$  are plotted in the columns of Web Figure 1(a) and the true  $\ln(\lambda)$  matrix is plotted in Web Figure 1(b). Each row in  $U$  corresponds to one sample and each row in  $V$  indicates one taxon profile. In Web Figure 1(c) & (d), we applied complete linkage hierarchical clustering to  $U, V$  [Eisen et al., 1998]. It is clear that both taxa and samples could be clustered into 4 groups.

## 4 Web Appendix D

As an example, Web Figure 2 shows a typical case that how the fitted distribution changes in setting (1) as inflated zeros percentages go from 0% to 40%. All methods work well when inflated zeros do not exist. When the true zero percentage goes higher (20%), the estimated distribution from log-SVD shifts to the left to capture the excessive zeros. When true zero percentage continues growing to 40%, our method is the only method that could keep the right clustering of both samples and taxa. log-SVD fails to recover the underlying Poisson rate distribution under such a high true zero percentage. PSVDOS performs better to some extent, but also fails to capture the right taxa clustering just like log-SVD. GOMMS successfully clusters the taxa, but the sample clustering is not reflected because it assigns each taxon a single probability of true zero and this might limit the heterogeneity between samples.



## References

Michael B Eisen, Paul T Spellman, Patrick O Brown, and David Botstein. Cluster analysis and display of genome-wide expression patterns. *Proceedings of the National Academy of Sciences*, 95(25):14863–14868, 1998.

Jorge J Moré and Danny C Sorensen. Computing a trust region step. *SIAM Journal on Scientific and Statistical Computing*, 4(3):553–572, 1983.

Yaxiang Yuan. Nonlinear optimization: trust region algorithms. In *Proceedings of the Third Chinese SIAM Conference*, pages 84–102, 1999.

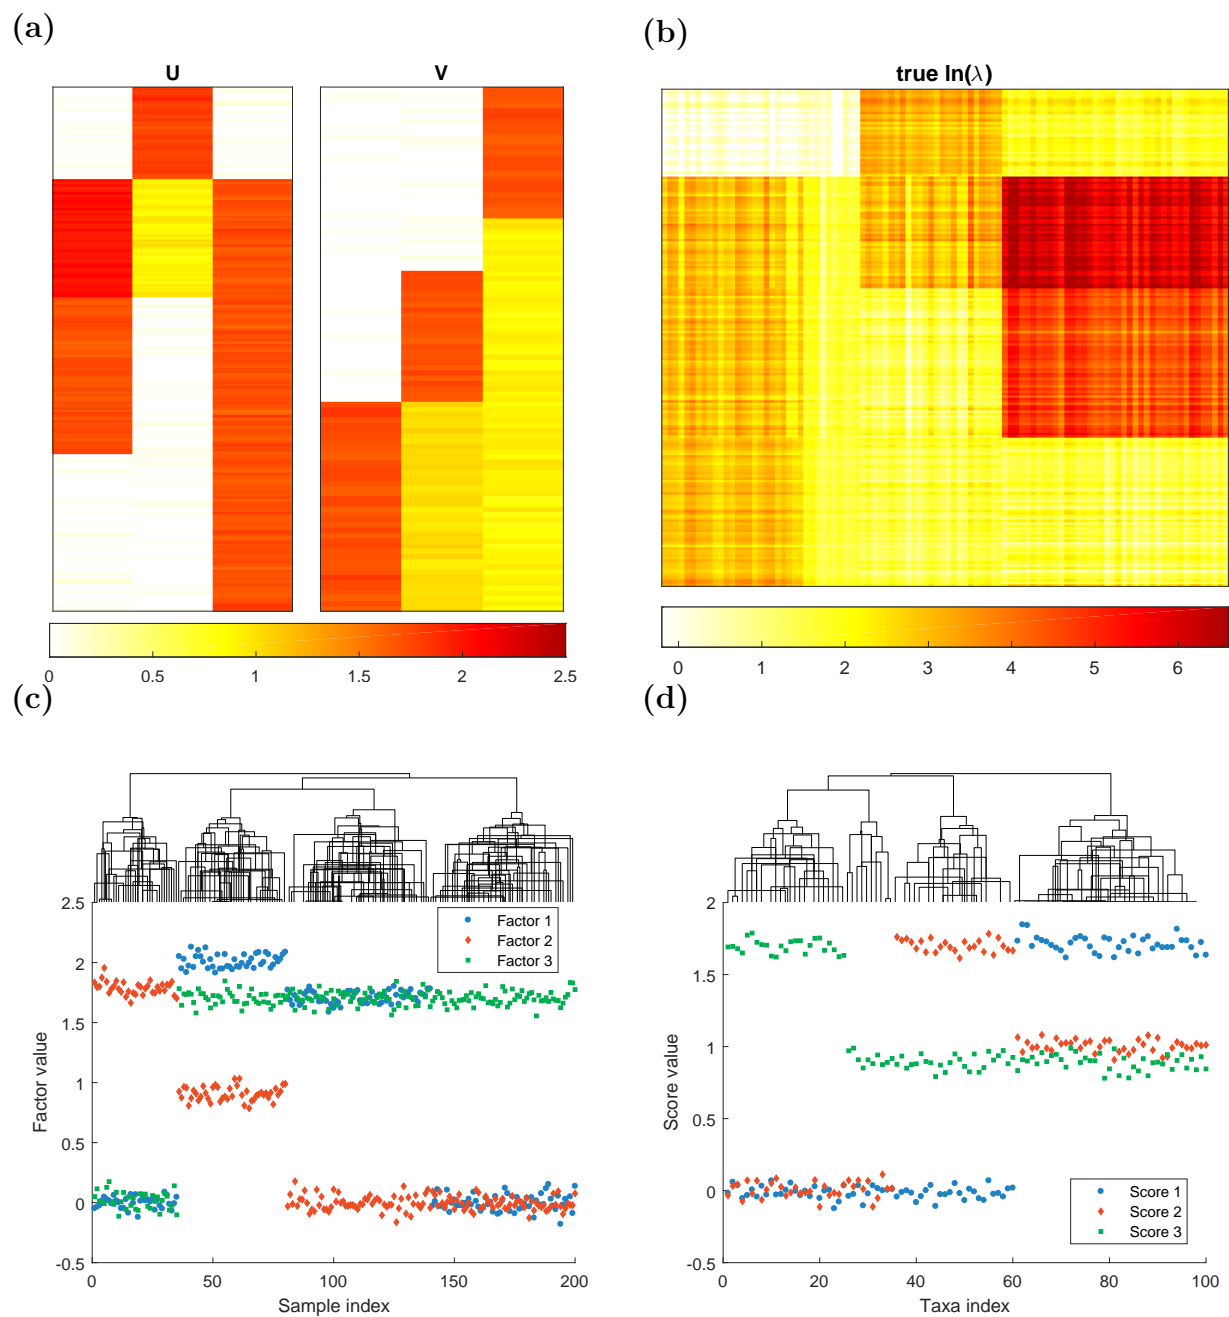

Web Figure. 1: Plots of simulation parameters. (a) True left singular vectors  $U$  and true right singular vector  $V$ , indicating taxon clusters. (b) Heatmap of true  $\ln(\lambda)$  matrix. (c)(d) The factor values for each sample/taxa. They could be clustered into 4 groups.

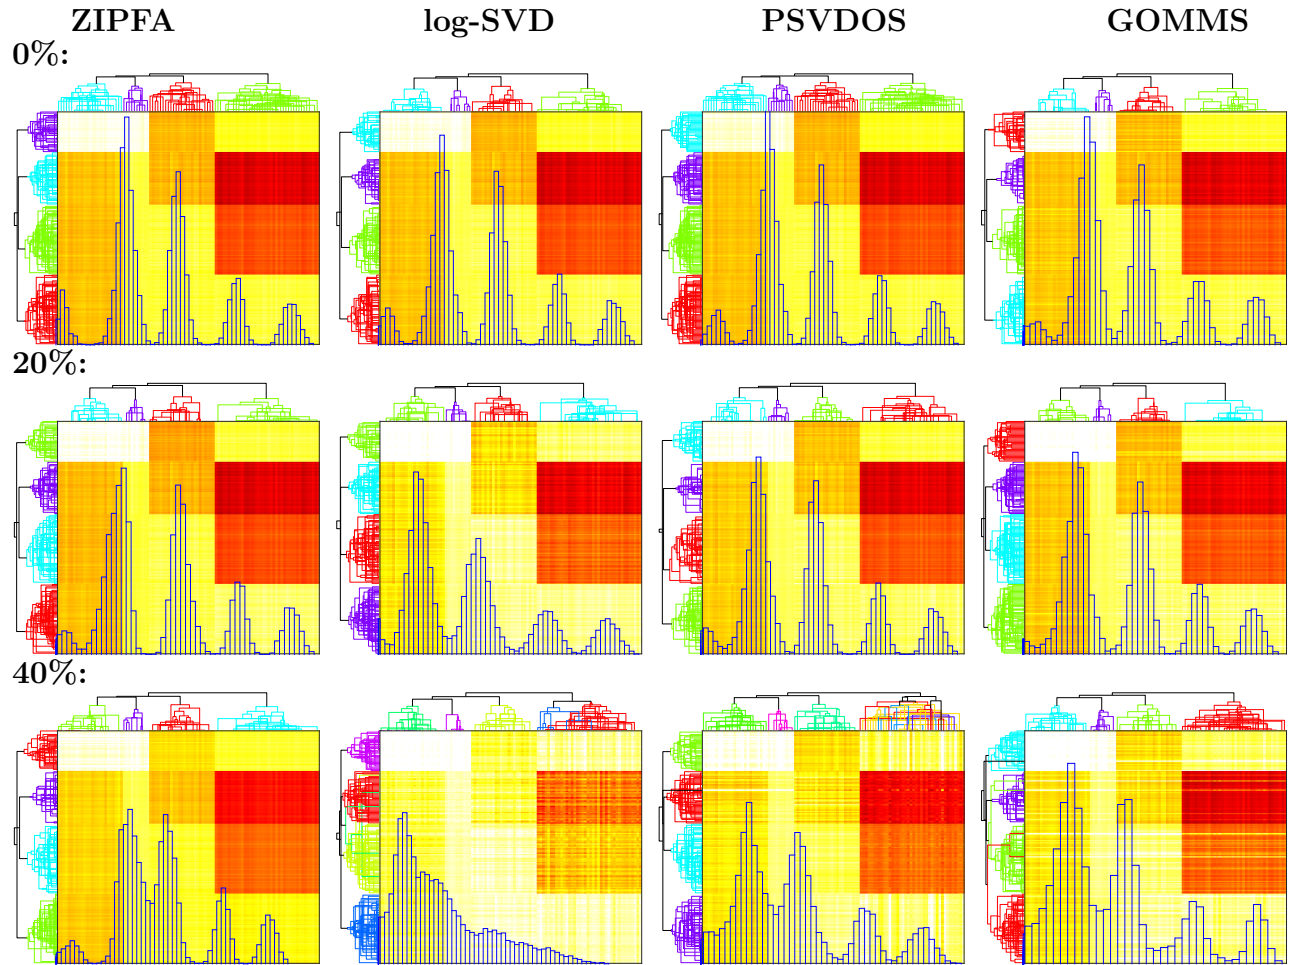

Web Figure. 2: Heatmap of  $\hat{U}\hat{V}^T$  from different methods in setting 1. Blue histogram shows the distribution of fitted  $\hat{U}\hat{V}^T$ ; Phylogenetic tree on the top and left shows clustering of taxa and samples.

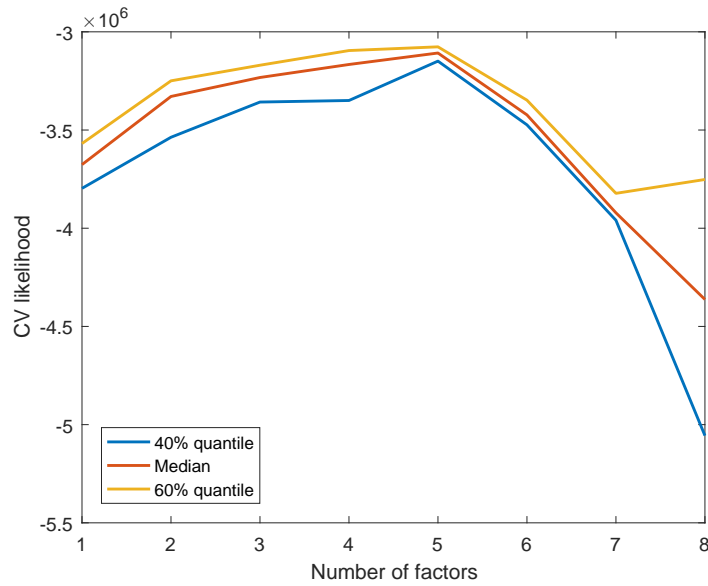

Web Figure. 3: Cross validation to choose the number of factors in real data analysis. At a specified rank, we obtain several CV likelihoods by assigning test sets randomly. Three solid lines indicate 40%, 50% and 60% quantile of the CV likelihoods.

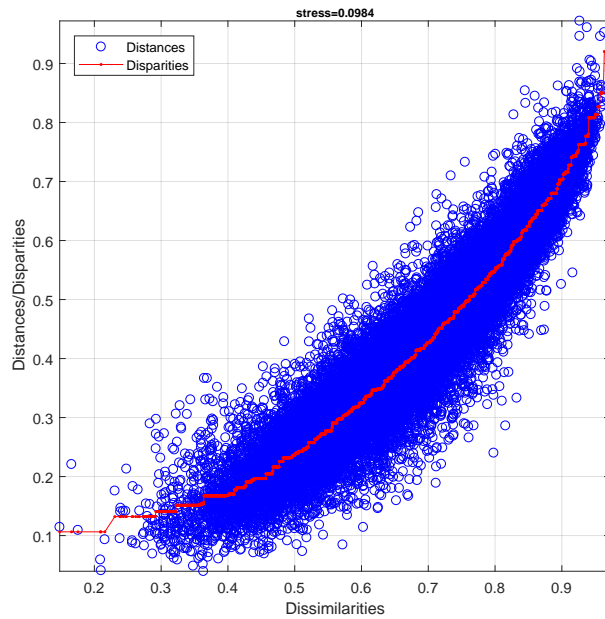

Web Figure. 4: Shepard stress plot for nMDS model in Subsection 4.2

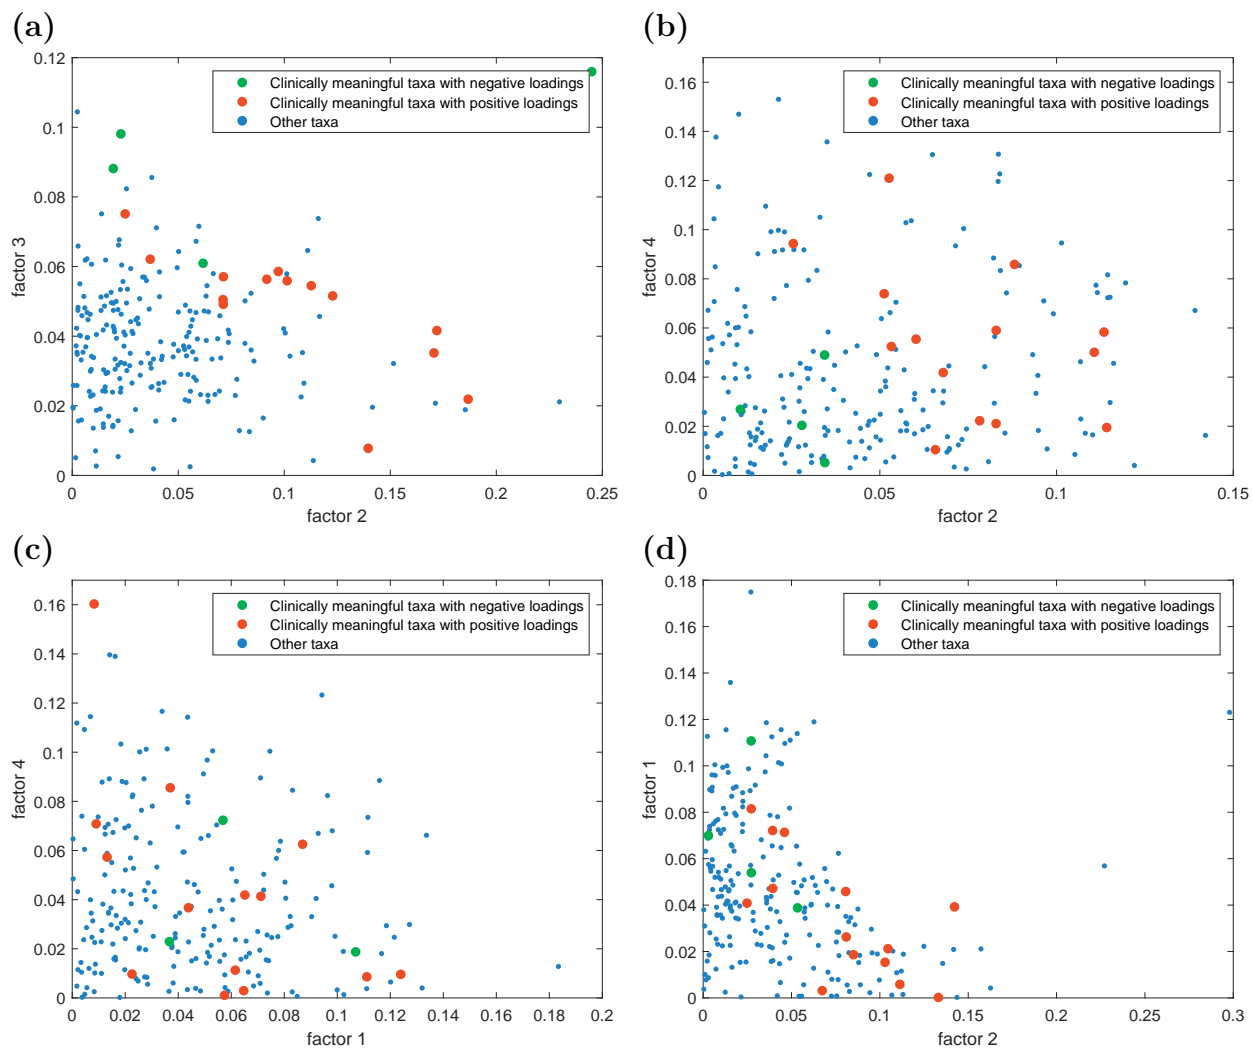

Web Figure. 5: Absolute taxon loadings on the two most significant factors. Each point is a loading coordinate of a taxon on these two factors. Blue or red dots are clinically meaningful taxa in other literature. (a) Loadings on factor 2, 3 of our proposed ZIPFA. (b) Loadings on factor 2, 4 of log-SVD. (c) Loadings on factor 1, 4 of PSVDOS. (d) Loadings on factor 1, 2 of GOMMS

Web Table 1: Coefficients and p-value of 5 factors in different models

| Response                 | ZIPFA   |          | log-SVD |          | PSVDOS  |         | GOMMS   |          | PCoA    |          | nMDS    |          |
|--------------------------|---------|----------|---------|----------|---------|---------|---------|----------|---------|----------|---------|----------|
|                          | coef    | p-value  | coef    | p-value  | coef    | p-value | coef    | p-value  | coef    | p-value  | coef    | p-value  |
| MeanAttLoss <sup>a</sup> | 0.0215  | 0.038*   | 0.0039  | 0.434    | 0.0043  | 0.352   | 0.0009  | 0.903    | -0.4522 | 0.008**  | -0.5448 | 0.004**  |
|                          | -0.0039 | 0.029*   | 0.0090  | 0.001**  | 0.0018  | 0.673   | -0.0034 | 0.150    | 0.1073  | 0.587    | -0.3279 | 0.154    |
|                          | 0.0138  | 0.003**  | -0.0053 | 0.190    | -0.0020 | 0.294   | 0.0020  | 0.492    | -0.4579 | 0.033*   | -0.2522 | 0.295    |
|                          | 0.0071  | 0.089    | -0.0023 | 0.569    | 0.0016  | 0.524   | -0.0024 | 0.318    | 0.0702  | 0.793    | -0.1403 | 0.628    |
|                          | -0.0012 | 0.709    | 0.0081  | 0.138    | 0.0028  | 0.464   | 0.0000  | 0.993    | -0.2946 | 0.334    | 0.4371  | 0.176    |
| Mean PD <sup>b</sup>     | 0.0088  | 0.111    | 0.0014  | 0.586    | 0.0052  | 0.032*  | 0.0097  | 0.016*   | -0.2420 | 0.008**  | -0.3114 | 0.002**  |
|                          | -0.0033 | 0.001*** | 0.0062  | 0.000*** | -0.0006 | 0.796   | -0.0048 | 0.000*** | 0.0878  | 0.409    | -0.1943 | 0.116    |
|                          | 0.0056  | 0.023*   | -0.0031 | 0.140    | 0.0001  | 0.938   | 0.0017  | 0.264    | -0.2412 | 0.037*   | -0.0685 | 0.596    |
|                          | 0.0018  | 0.420    | -0.0043 | 0.046*   | -0.0004 | 0.789   | -0.0010 | 0.425    | 0.2354  | 0.103    | -0.3275 | 0.036*   |
|                          | -0.0013 | 0.453    | 0.0034  | 0.242    | 0.0024  | 0.241   | 0.0018  | 0.390    | -0.0132 | 0.936    | 0.1198  | 0.489    |
| Mean BP <sup>c</sup>     | 0.0069  | 0.108    | 0.0002  | 0.937    | 0.0014  | 0.444   | 0.0030  | 0.341    | -0.3098 | 0.000*** | -0.3442 | 0.000*** |
|                          | -0.0032 | 0.000*** | 0.0053  | 0.000*** | 0.0018  | 0.285   | -0.0030 | 0.002**  | 0.0462  | 0.575    | -0.0327 | 0.733    |
|                          | 0.0049  | 0.010**  | 0.0011  | 0.491    | 0.0000  | 0.964   | 0.0007  | 0.591    | -0.0168 | 0.851    | 0.0621  | 0.535    |
|                          | 0.0023  | 0.191    | -0.0025 | 0.138    | 0.0025  | 0.017*  | 0.0000  | 0.975    | 0.1172  | 0.292    | -0.1597 | 0.186    |
|                          | -0.0016 | 0.224    | 0.0039  | 0.080    | 0.0024  | 0.130   | 0.0014  | 0.405    | 0.0612  | 0.629    | -0.0394 | 0.769    |

<sup>a</sup>Mean attachment loss.

<sup>b</sup>Mean probing depth.

<sup>c</sup>Mean bleeding on probing.

Web Table. 2: The loading values and ranks of potentially clinically meaningful taxa in ZIPFA and log-SVD

| ZIPFA                       |      |         | log-SVD                     |      |         |
|-----------------------------|------|---------|-----------------------------|------|---------|
| taxa                        | rank | loading | taxa                        | rank | loading |
| Actinomyces HOT 169         | 1    | -0.245  | Eubacterium[11][G-3] spp.   | 10   | 0.114   |
| Streptococcus_mutans        | 3    | -0.187  | Fretibacterium spp. HOT 360 | 11   | 0.113   |
| Eubacterium[11][G-5] spp.   | 5    | 0.172   | Fretibacterium spp.         | 14   | 0.111   |
| Treponema spp.              | 7    | 0.171   | Eubacterium[11][G-5] spp.   | 29   | 0.088   |
| Bacteroidetes[G-5] HOT 511  | 10   | 0.140   | Eubacterium[11][G-6] spp.   | 37   | 0.083   |
| Porphyromonas_gingivalis    | 11   | 0.123   | TM7[G-1] spp.               | 38   | 0.083   |
| TM7[G-1] spp.               | 15   | 0.113   | TM7 spp.                    | 44   | 0.079   |
| Porphyromonas spp.          | 21   | 0.101   | Filifactor spp.             | 58   | 0.068   |
| Filifactor spp.             | 25   | 0.097   | Treponema spp.              | 60   | 0.066   |
| Eubacterium[11][G-6] spp.   | 26   | 0.092   | Bacteroidetes[G-5] HOT 511  | 67   | 0.060   |
| TM7 spp.                    | 41   | 0.071   | Porphyromonas_gingivalis    | 82   | 0.053   |
| Fretibacterium spp.         | 42   | 0.071   | Porphyromonas spp.          | 84   | 0.053   |
| Fretibacterium spp. HOT 360 | 43   | 0.071   | Prevotella_intermedia       | 89   | 0.051   |
| Actinomyces HOT 175         | 58   | -0.062  | Actinomyces_naeslundii      | 122  | -0.034  |
| Prevotella_intermedia       | 108  | 0.037   | Actinomyces HOT 170         | 123  | -0.034  |
| Eubacterium[11][G-3] spp.   | 134  | 0.025   | Actinomyces HOT 169         | 140  | -0.028  |
| Actinomyces_naeslundii      | 142  | -0.023  | Streptococcus_mutans        | 147  | -0.026  |
| Actinomyces HOT 170         | 161  | 0.019   | Actinomyces HOT 175         | 195  | -0.011  |
